# Supplementary material for: Monitoring cognitive change in multiple sclerosis using a computerized cognitive battery
Source: PubMed Central journal article supplement — Mult Scler J Exp Transl Clin. 2018 Dec 10;4(4):2055217318815513. doi: 10.1177/2055217318815513 (PMC6293367; doi:10.1177/2055217318815513), 2018-12-10

### A. DET Accuracy

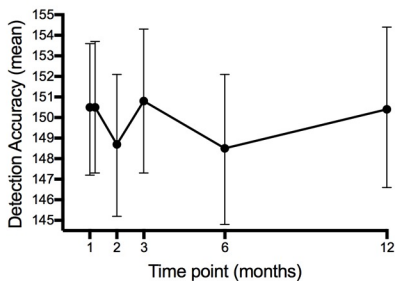

### B. IDN Accuracy

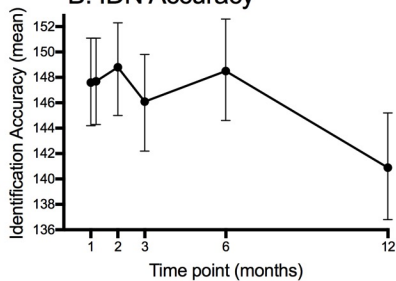

### C. ONB Speed

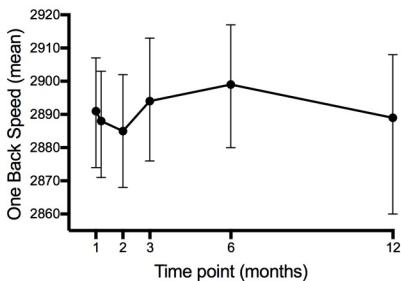

### D. ONB Accuracy

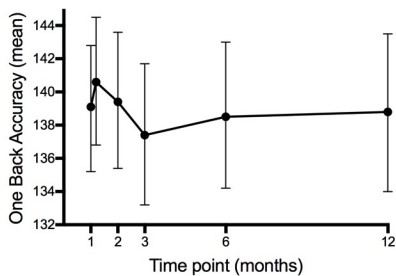

### E. OCL Speed

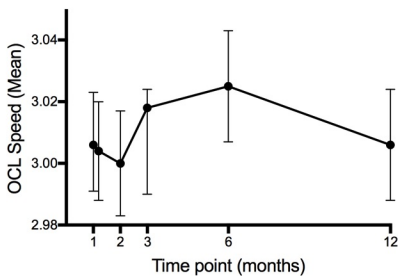

### F. OCL Accuracy

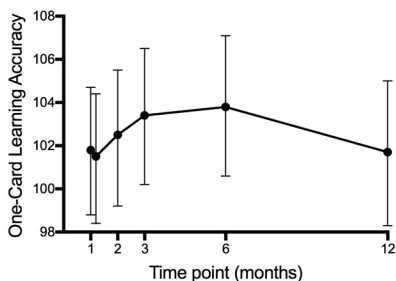

### G. CPAL Errors

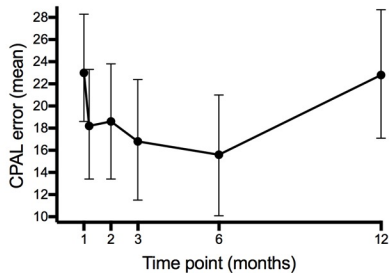

### H. GML errors

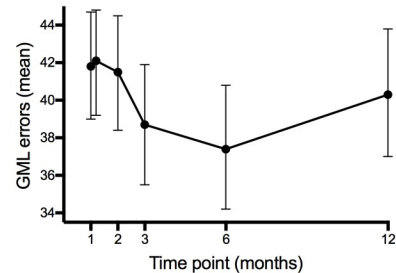

Supplement: Supplemental_Material.pdf [file Supplemental_Material.pdf]
